# Supplementary material for: Tumor-homing bacterium-adsorbed liposomes encapsulating perfluorohexane/doxorubicin enhance pulsed-focused ultrasound for tumor therapy
Source: Royal Society of Chemistry journal article supplement (doi:10.1039/d3ra01876h), 2023-01-01
Supplement: d3ra01876h1.pdf [file d3ra01876h1.pdf]

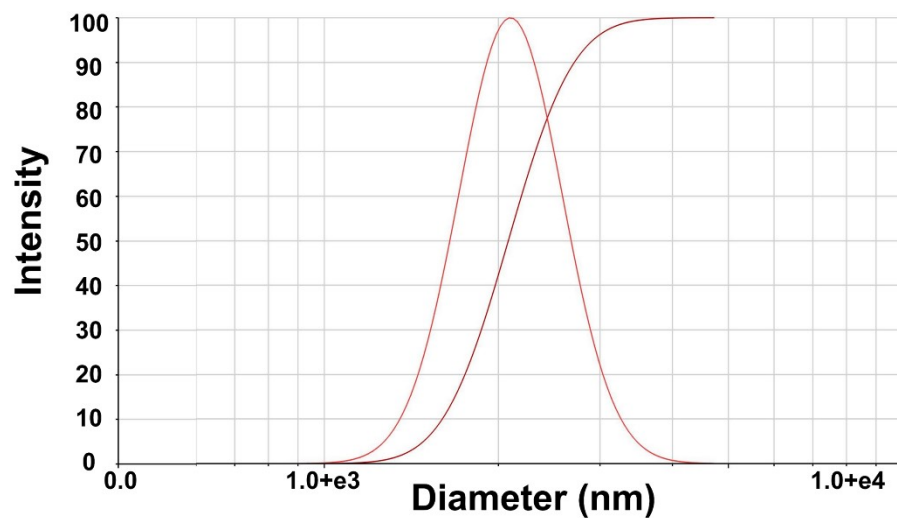

Fig. S1 One of the sizes of CL-PFH-DOX-NPs in length.

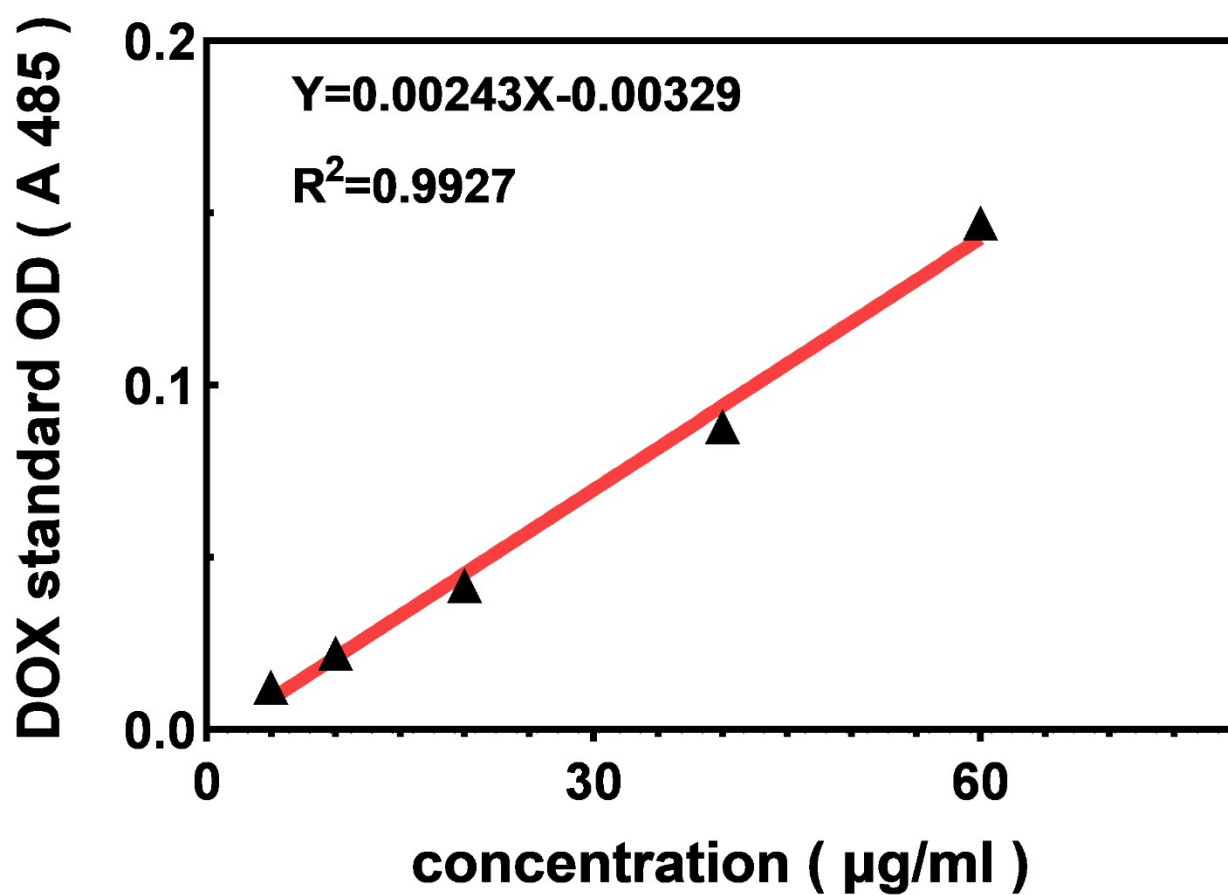

Fig. S2 Figure S2. Calibration curve of DOX from the absorbance at 485nm with different concentrations

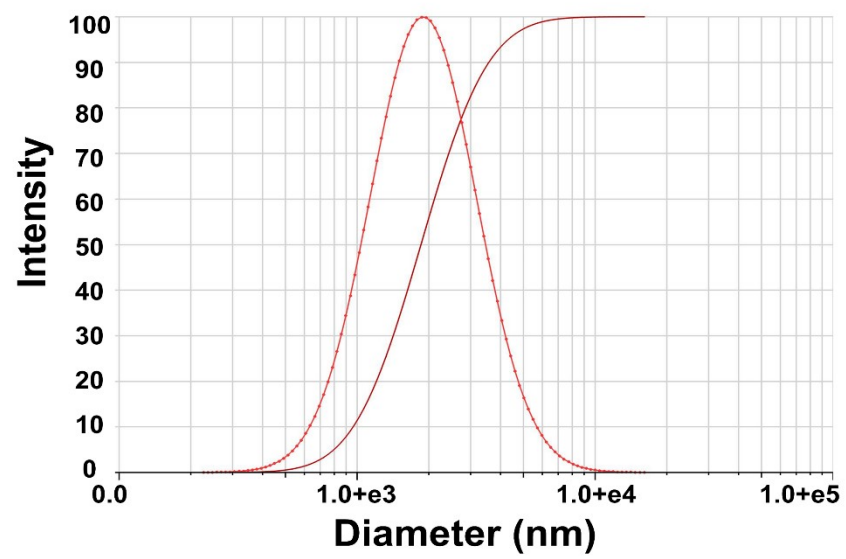

Fig. S3 Figure S3. One of the sizes of B.bifidum@CL-PFH-DOX-NPs in length.

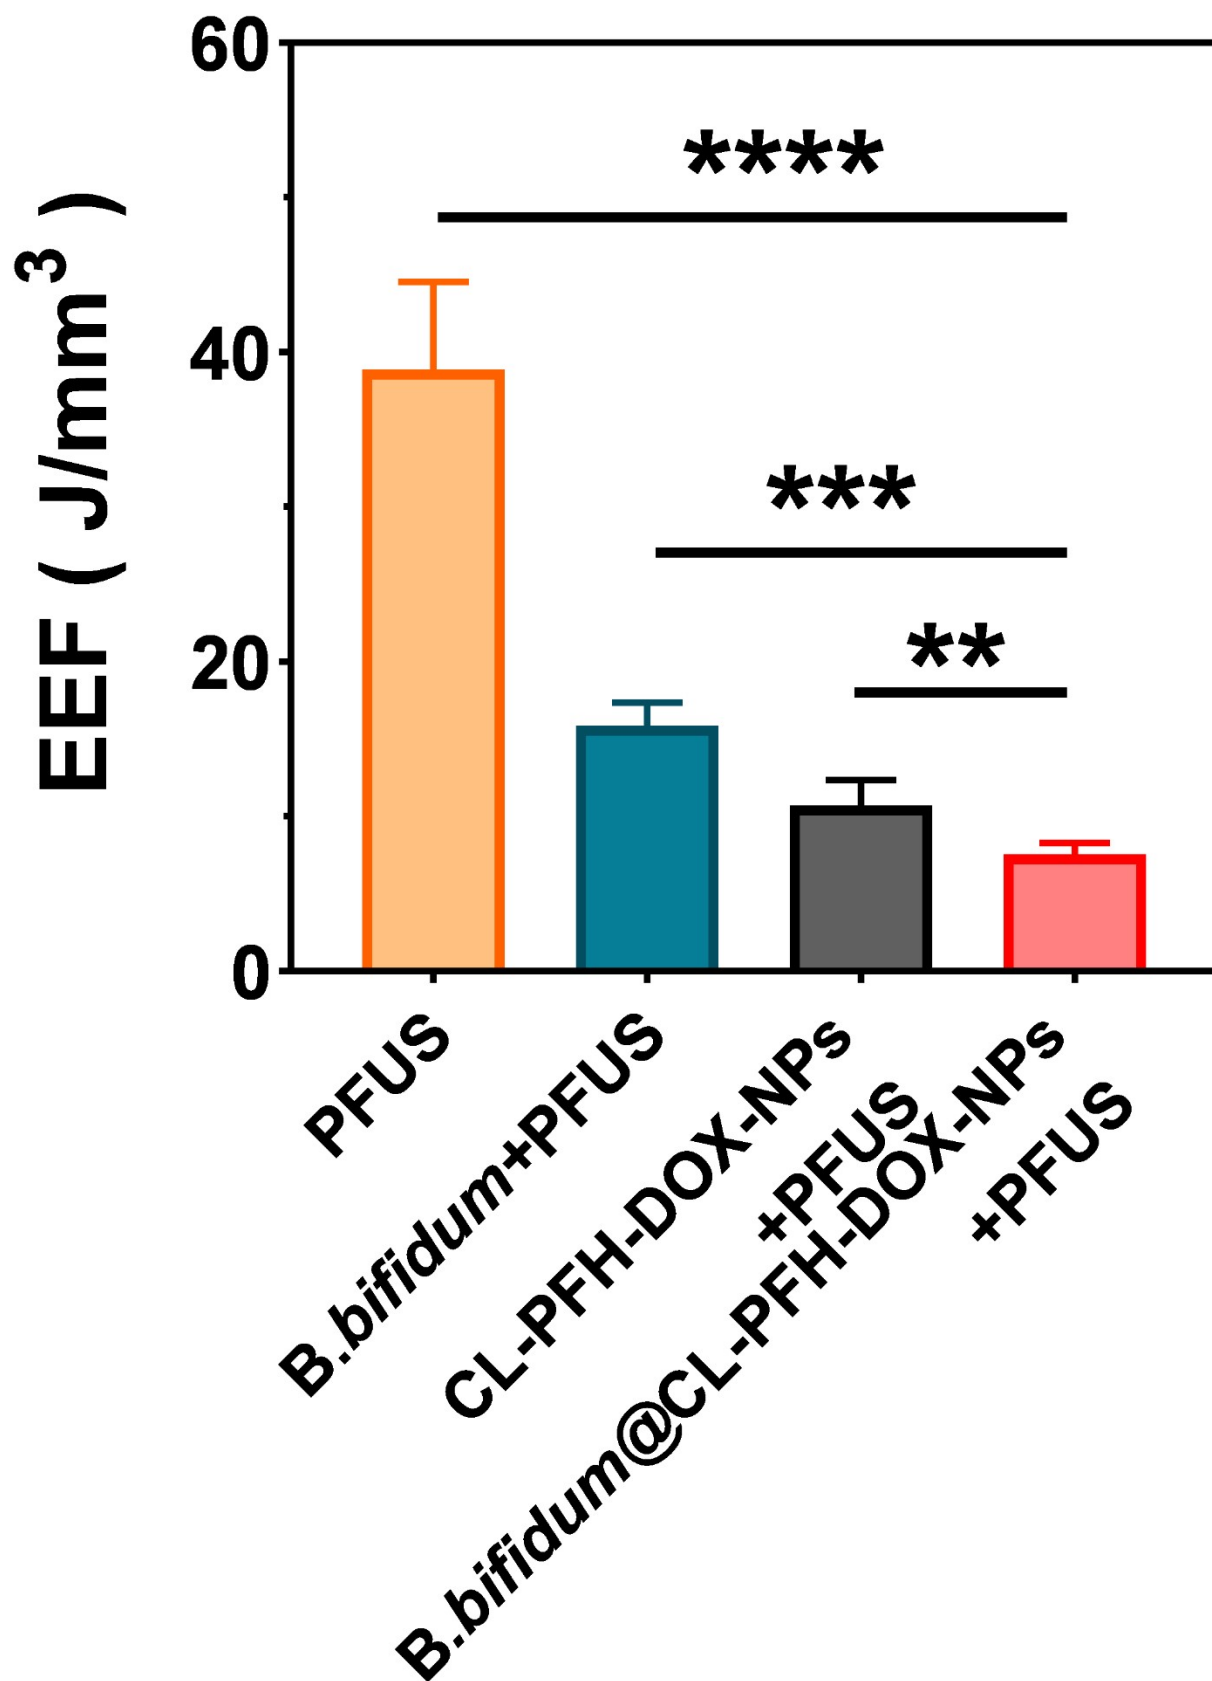

Figure S4. EEF analysis of different groups.

(n=5, \*\*P<0.01, \*\*\*P<0.001, \*\*\*\*P<0.0001)

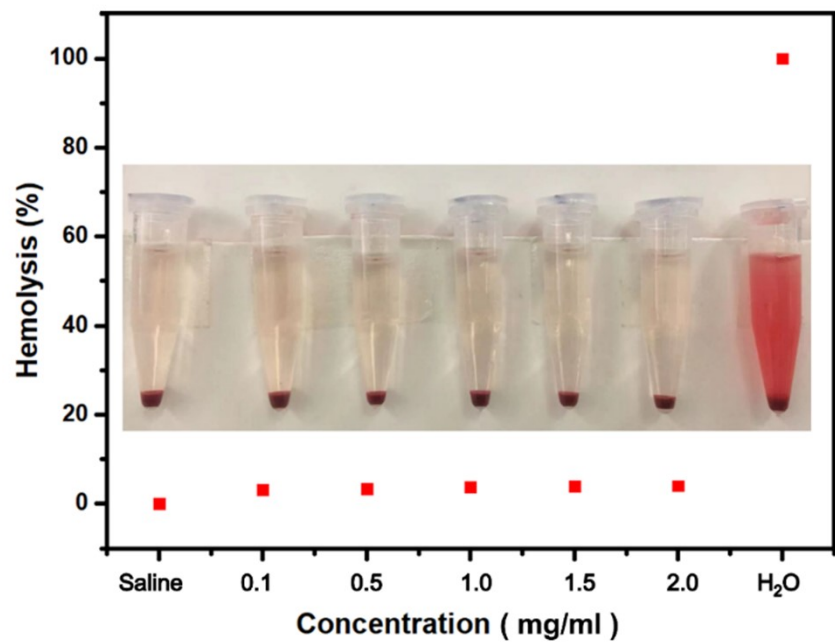

Figure S5. The hemolysis test of CL-PFH-DOX-NPs at different concentrations.
